# Supplementary material
Source: PubMed Central journal article supplement (PMC2754617)
Supplement: pp.109.143487_1.pdf [file pp.109.143487_1.pdf]

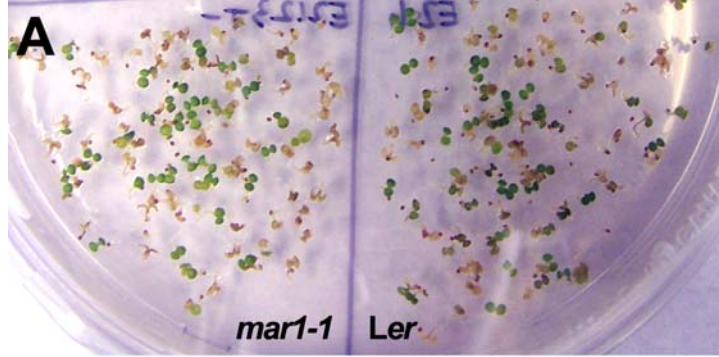

Hygromycin (9 mg/L)

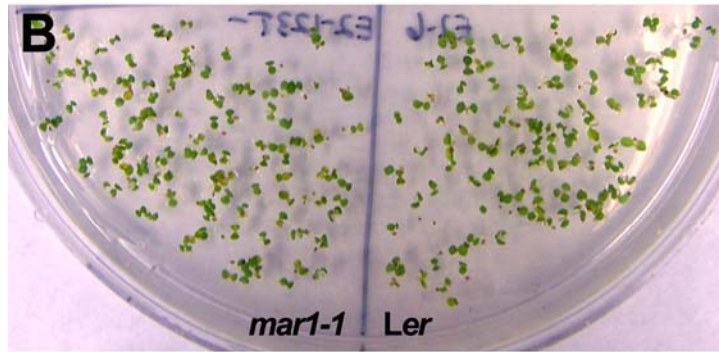

G418 (50 mg/L)

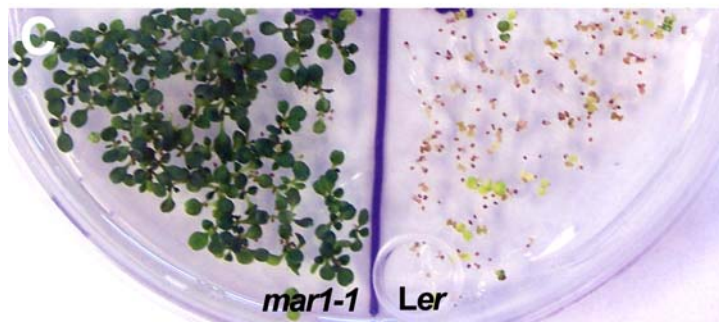

Kanamycin (25 mg/L)

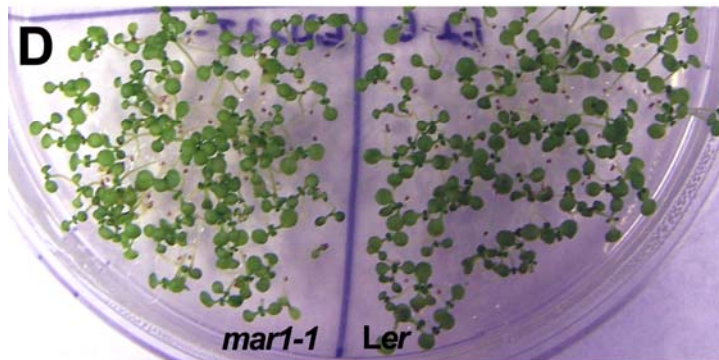

MS (no antibiotic)

Suppl. Figure 1. *mar1-1* is not resistant to the aminoglycosides hygromycin and G418. Seeds were surface sterilized and plated on MS plates (plus or minus antibiotic) as described in Methods. Seedlings were photographed after two weeks of growth on the indicated concentration of antibiotic. Kanamycin (C) and plain MS (D) are included as controls.
