# Supplementary material
Source: PubMed Central journal article supplement (PMC2754617)
Supplement: pp.109.143487_2.pdf [file pp.109.143487_2.pdf]

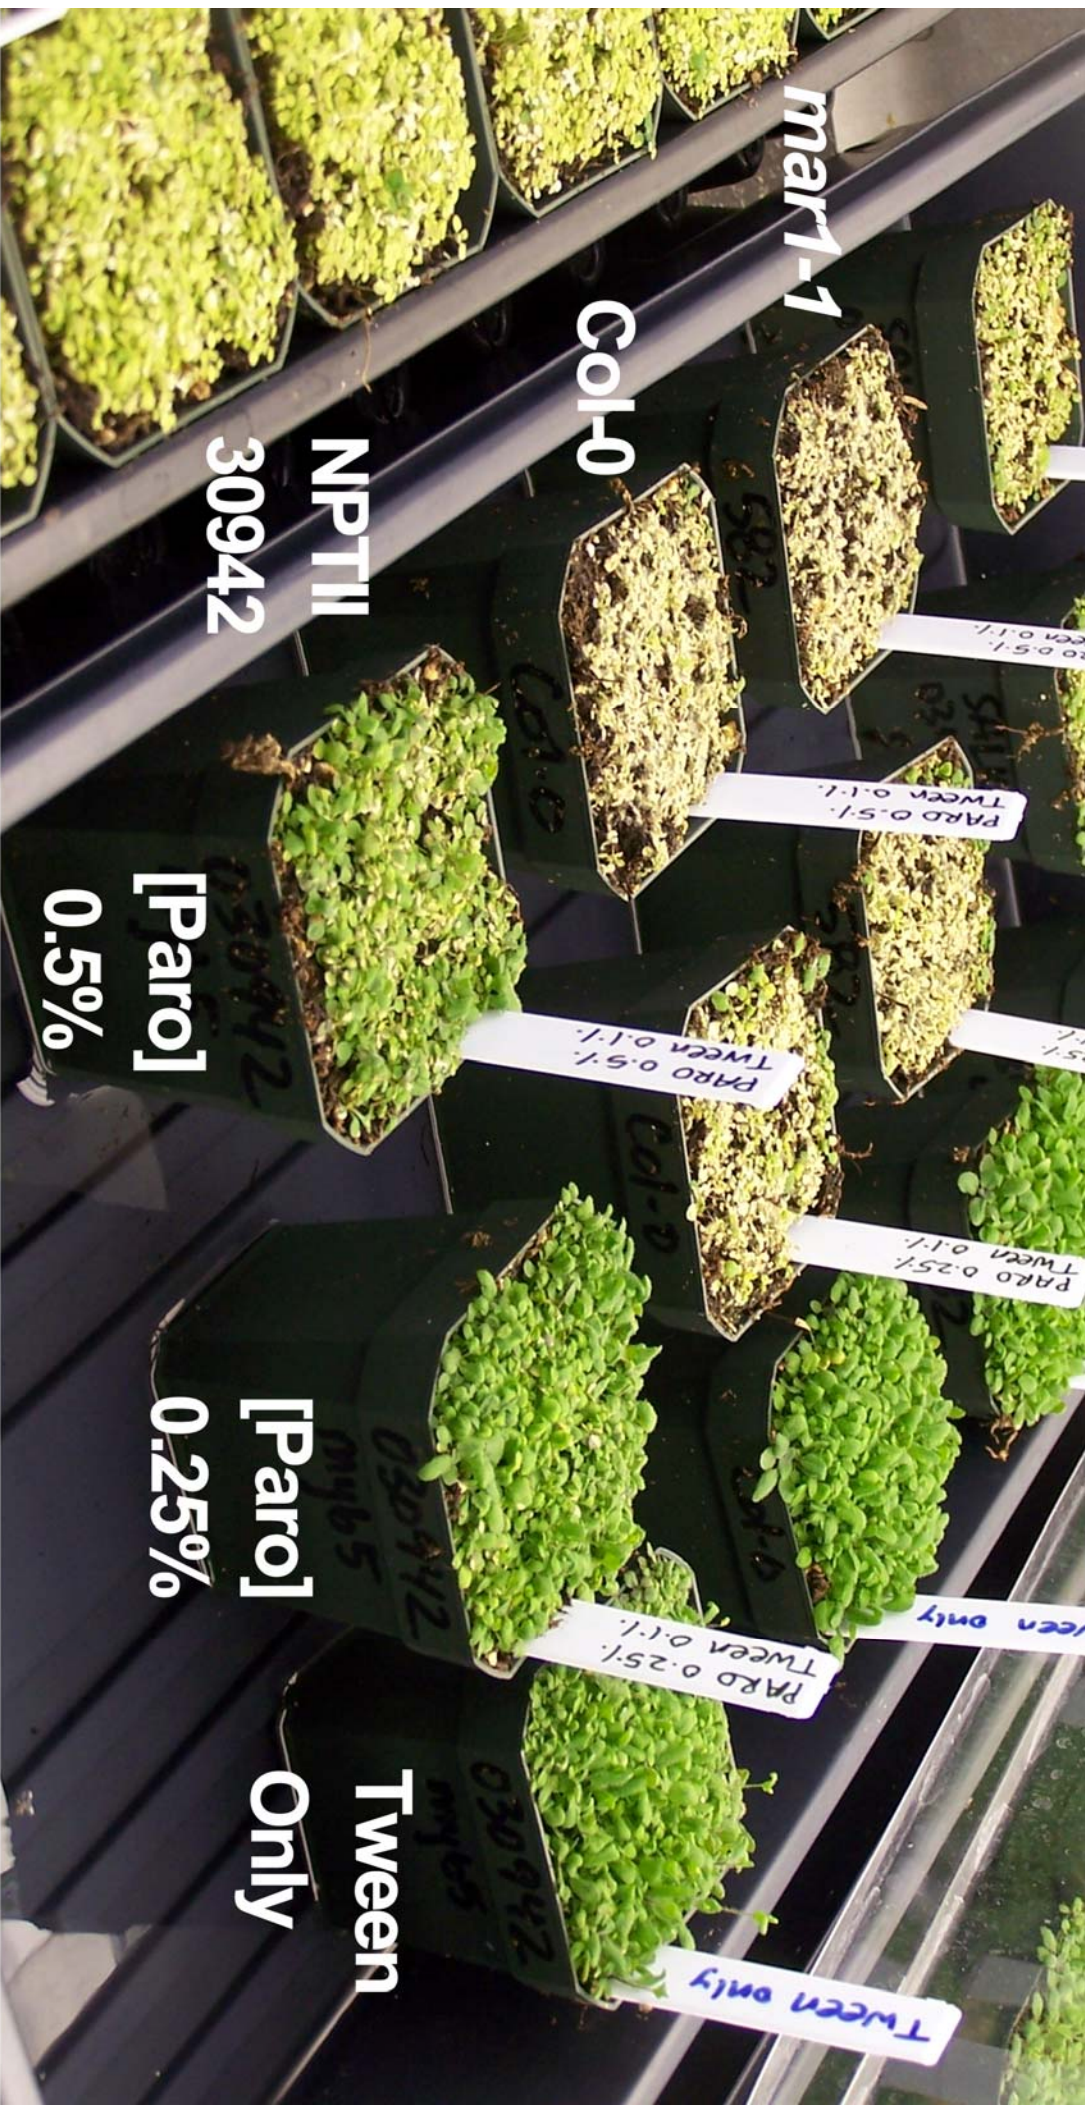

**Suppl. Figure 2. *mar1-1* is not resistant to the aminoglycoside paromomycin.** Plants were grown for 20 days in soil under constant light conditions in a growth room. Approximately 25 mL of a paromomycin solution (first and second columns, concentrations as indicated) or tween-only control (third column) was sprayed on plants as indicated. Front row – Salk\_030942, second row – Col-0, third row – *mar1-1*. Photos were taken 7 days after spraying. Paromomycin concentration is given as % w/v. Tween 20 is used in all solutions as a surfactant at 0.1% v/v.
