# Supplementary material
Source: PubMed Central journal article supplement (PMC2754617)
Supplement: pp.109.143487_3.pdf [file pp.109.143487_3.pdf]

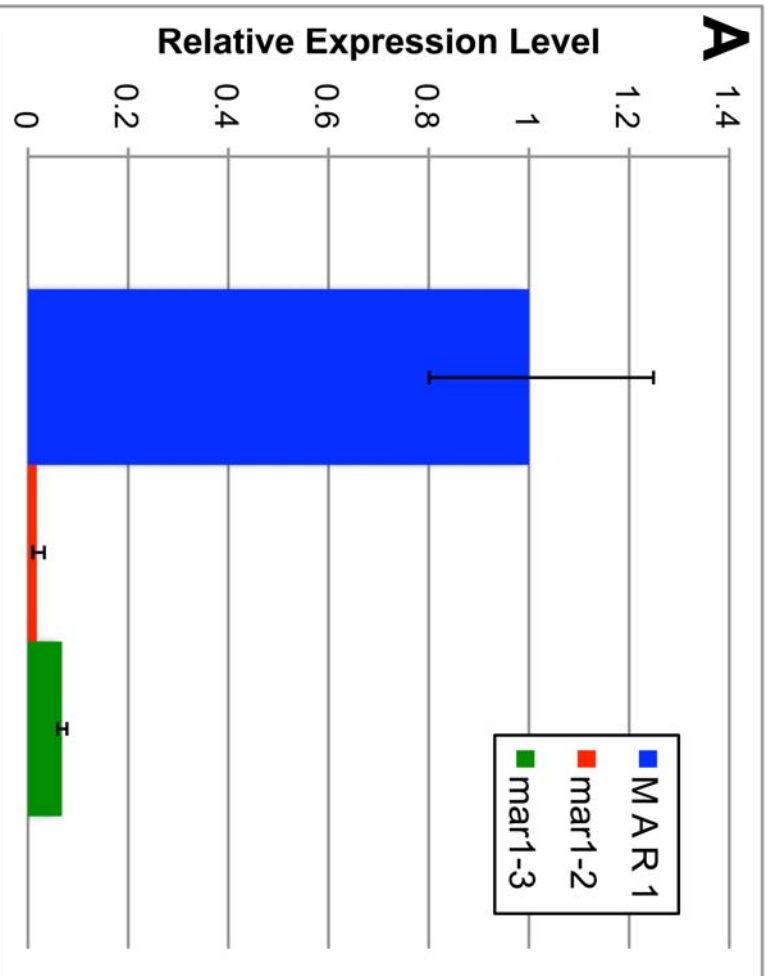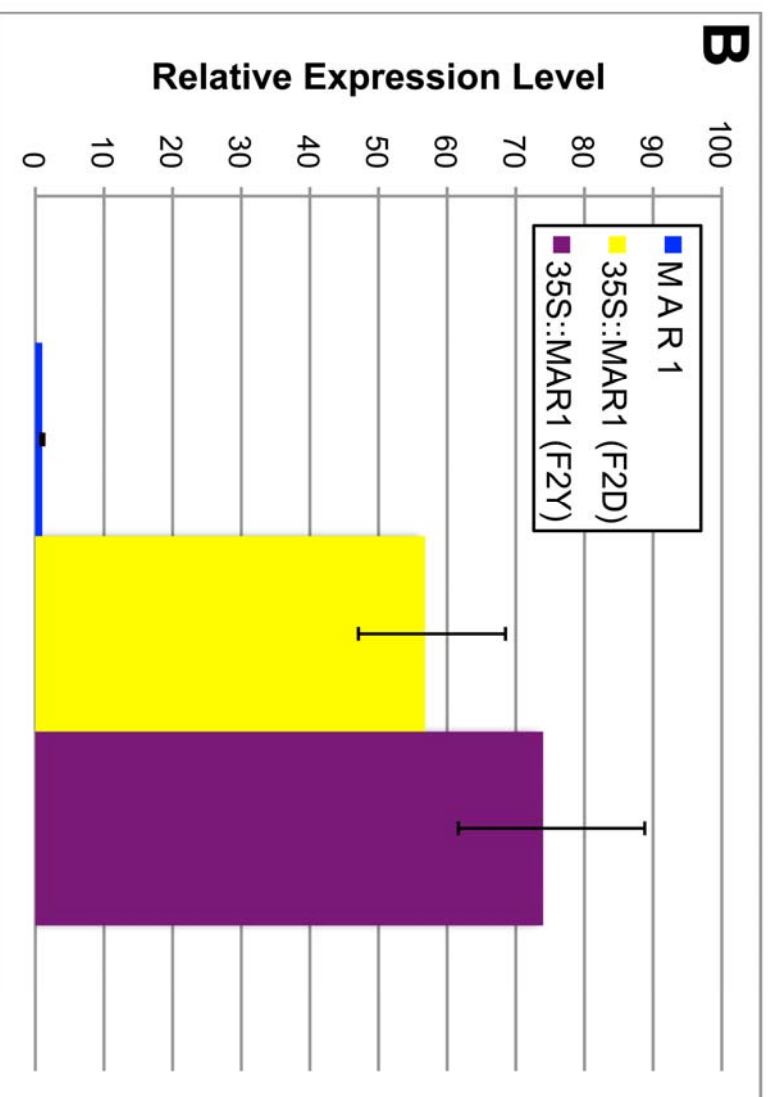

**Suppl. Figure 3. Levels of MAR1 expression in T-DNA lines (mar1-2 and mar1-3) and**

**35S::MAR1 overexpression lines (F2D and F2Y). Gene expression levels were measured by relative quantitative RT-PCR. The results were calculated using the comparative Ct method (ABI bulletin) and presented as fold changes compared with wild type (indicated here as MAR1). All values were standardized to the level of actin expression in each line. Error bars indicate the ranges of expression change.**
