# Supplementary material
Source: PubMed Central journal article supplement (PMC2754617)
Supplement: pp.109.143487_4.pdf [file pp.109.143487_4.pdf]

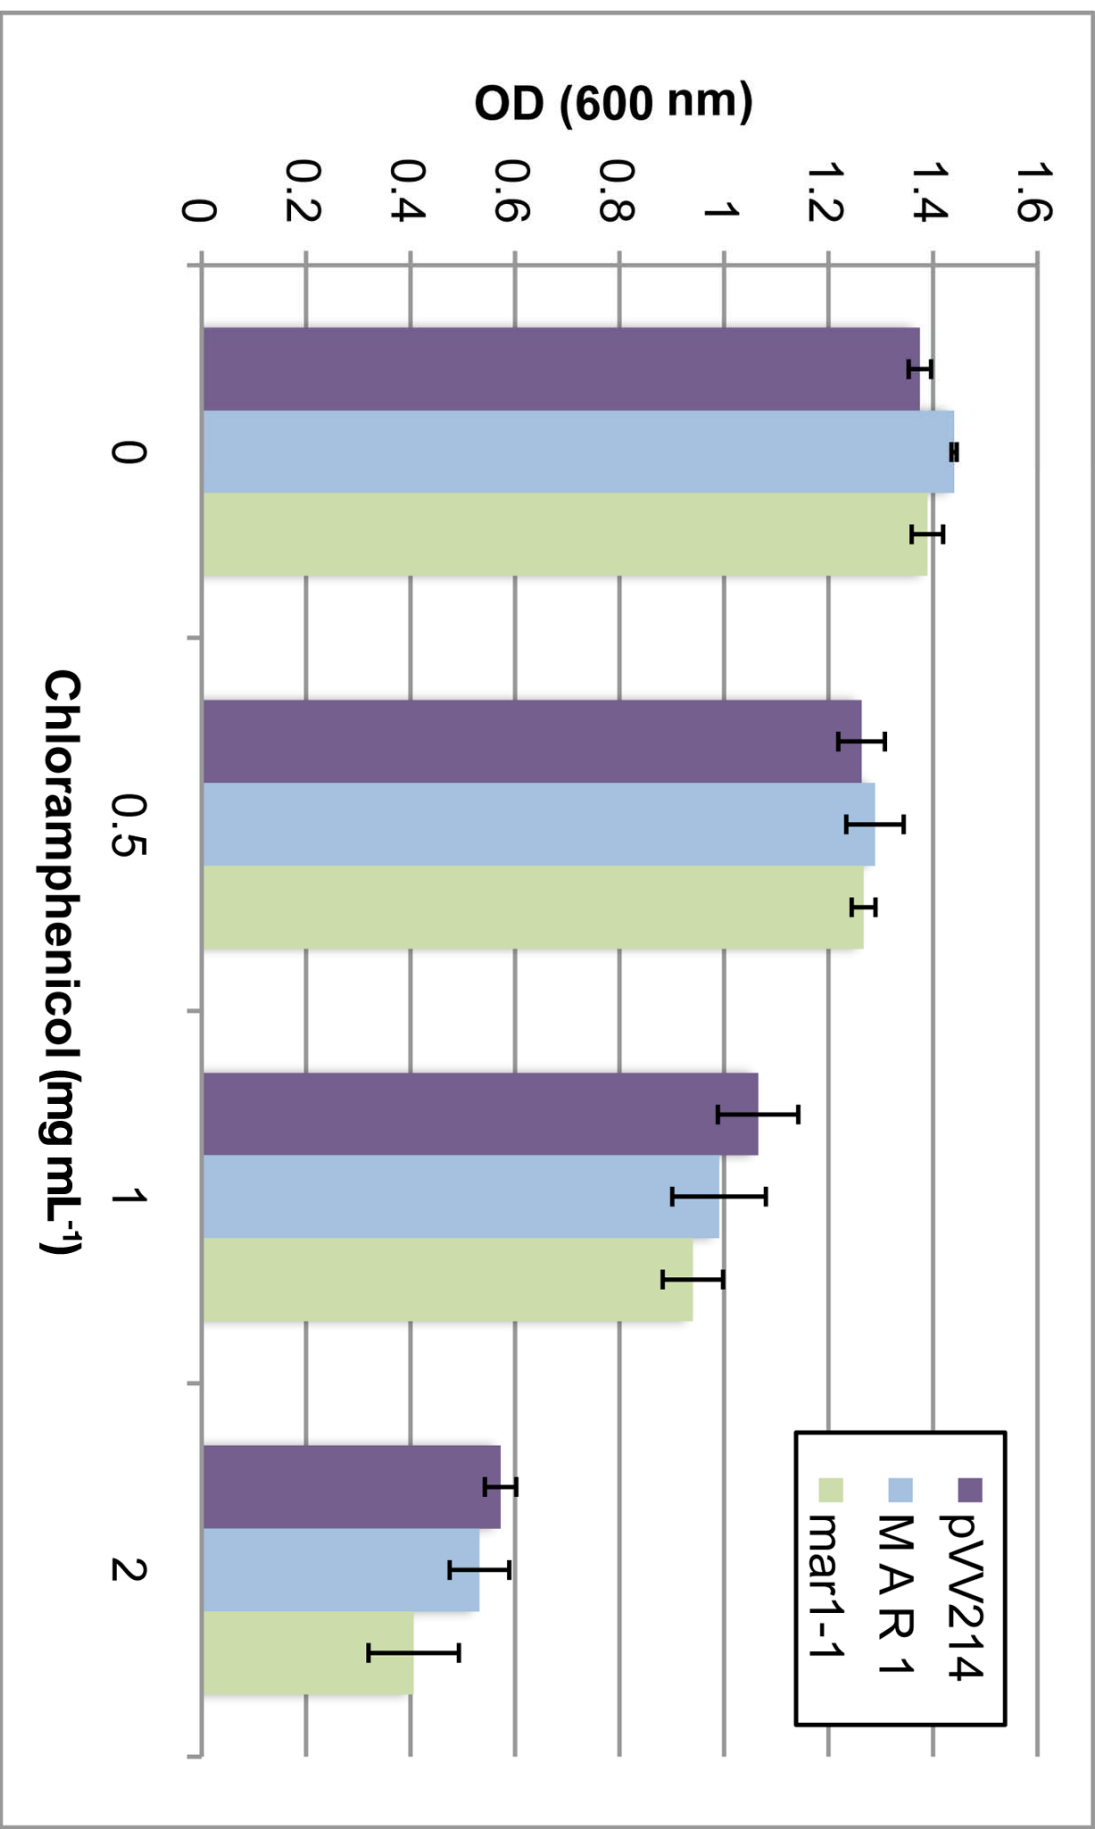

**Suppl. Figure 4. Expression of *MAR1* in yeast does not affect sensitivity to chloramphenicol.** *MAR1* and *mar1-1* were expressed in yeast under control of the PGK promoter (vector pVV214). Cultures were standardized to OD 0.01 at 600 nm before addition of chloramphenicol (0, 0.5, 1, and 2 mg/mL). Cultures were analyzed spectrophotometrically after 48 hours of growth, and ODs were plotted. Each bar represents the average absorbance of three independent cultures ( $\pm$ SD).
