# Supplementary material
Source: PubMed Central journal article supplement (PMC2754617)
Supplement: pp.109.143487_5.pdf [file pp.109.143487_5.pdf]

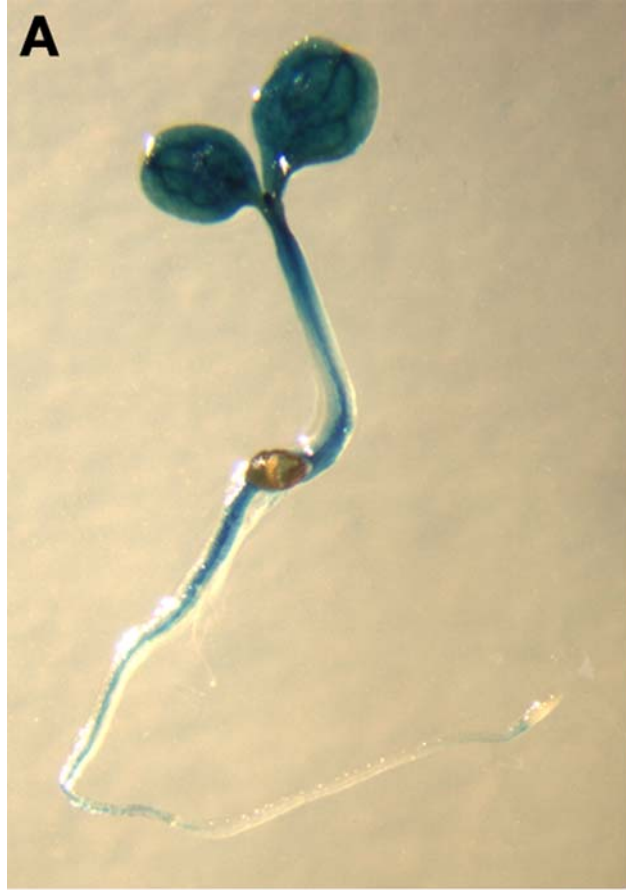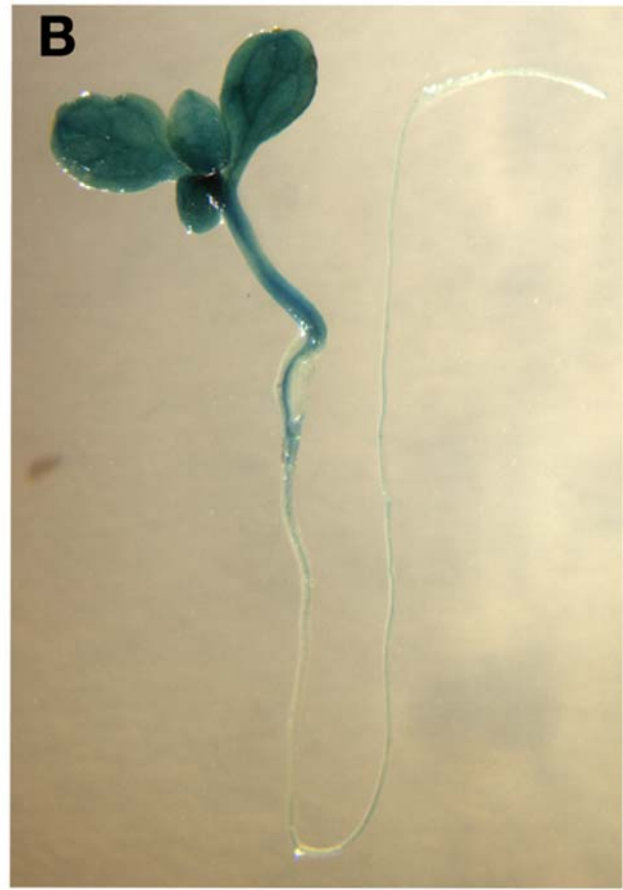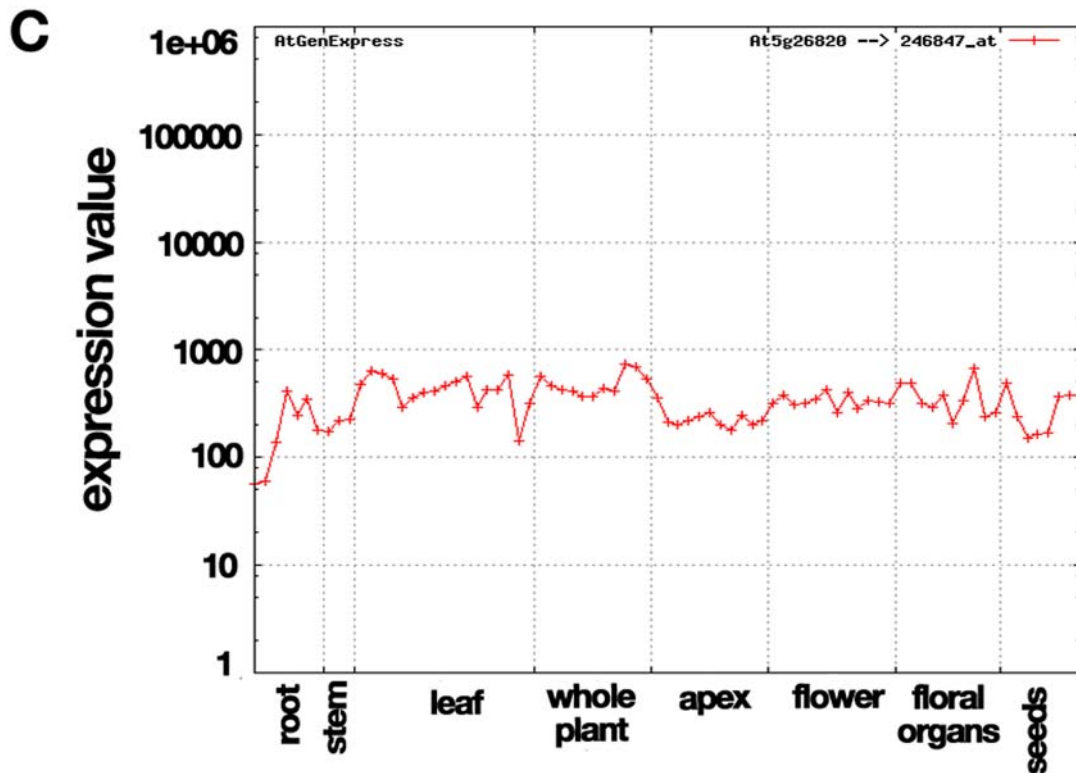

**Suppl. Figure 5. *MAR1* expression pattern. (A and B) *MAR1* is strongly expressed in all tissues of young seedlings. The *GUS* gene was expressed under control of the *MAR1* promoter (888 bp upstream of the *MAR1* start codon). Histochemical X-Gluc staining was performed on several independent lines. (A) Representative 7-day-old seedling. (B) Representative 14 day-old seedling. (C) Developmental expression of *MAR1*. mRNA levels for *MAR1* (At5g26820) were obtained from AtGenExpress (Schmid et al., 2005).**
